# Supplementary material for: Palladium nanoparticles supported on a nickel pyrazolate metal organic framework as a catalyst for Suzuki and carbonylative Suzuki couplings
Source: Royal Society of Chemistry journal article supplement (doi:10.1039/c6dt02242a), 2016-01-01
Supplement: c6dt02242a1.pdf [file c6dt02242a1.pdf]

## Electronic Supplementary Information

# Palladium nanoparticles supported on a nickel pyrazolate metal organic framework as catalyst for Suzuki and carbonylative Suzuki couplings

A. W. Augustyniak<sup>a</sup>, W. Zawartka<sup>a</sup>, J. A. R. Navarro<sup>b\*</sup> and A. M. Trzeciak<sup>a\*</sup>

### 1. Experimental section

#### 1.1. Materials and methods

All materials including solvents were obtained from commercial sources, were of reagent grade and were used without further purification. Infrared (**IR**) spectra were acquired in transmission mode on a Bruker 113v FTIR spectrometer. Thermogravimetric analyses (**TGA**) were performed, under either nitrogen or a reactive air atmosphere, on a TG-DTA *Setaram* SETSYS 16/18 equipment, at a heating rate of 20 °C min<sup>-1</sup>. X-ray Powder Diffraction Structural Analysis (**XRPD**): except for the structural analysis, all the X-ray powder diffraction data were acquired on a D8 ADVANCE Bruker AXS diffractometer using CuK $\alpha$  radiation ( $\lambda = 1.5418 \text{ \AA}$ ). **Gas Adsorption Measurements** conventional adsorption isotherms were measured using a Micromeritics ASAP 2020 HD volumetric instrument under continuous adsorption conditions. Brunauer–Emmet–Teller (**BET**) analyses were carried out to determine the total specific surface areas for the N<sub>2</sub> isotherms at 77 K. **GC-FID and GC/MS** Spectra of the organic products were obtained using the HP 5890 (Hewlett Packard) instrument with mass detector 5971 A. Capillary column HP 5 was used with a non-polar liquid phase containing 95% of dimethyl- and 5% of diphenylpolysiloxane. **ICP** measurements of the palladium content were performed using spectrometer ARL model 3410.

**TEM** measurements were performed using a FEI Tecnai G<sup>2</sup> 20 X-TWIN electron microscope with LaB<sub>6</sub> catode providing 0.25 nm resolution. To the small sample of catalyst 2 mL of methanol were added and the resulted mixture was ultrasonically treated for 5 min. Specimens for TEM studies were prepared by putting a droplet of a colloidal suspension on a copper microscope grid followed by evaporating the solvent under IR lamp for 15 min. X-ray photoelectron spectra (**XPS**) were conducted on a Kratos Axis Ultra-DLD X-ray photoelectron spectrometer equipped with Al K $\alpha$  radiation (1486.6 eV)

### **1.2. Synthesis of MOF [Ni(H<sub>2</sub>BDP-SO<sub>3</sub>)<sub>2</sub>] <sup>1</sup>**

The [Ni(H<sub>2</sub>BDP-SO<sub>3</sub>)<sub>2</sub>] was prepared as described in the literature. H<sub>2</sub>BDP-SO<sub>3</sub>H (0.050 g, 0.172 mmol) was dissolved in DMSO (3 mL) in a 50 mL Schlenk flask, and DMF (3 mL) was added to this solution. The mixture was heated to 60 °C, and Ni(CH<sub>3</sub>COO)<sub>2</sub>·4H<sub>2</sub>O (0.085 g, 0.5 mmol) was added under stirring. The mixture was then allowed to react for 5 h at 160 °C. After being cooled at room temperature, the yellowish solid was collected by filtration, washed with DMF (3 × 10 mL), and dried under vacuum.

### **1.3. Synthesis of Pd@[NiH<sub>2</sub>BDP-SO<sub>3</sub>]**

In a typical synthesis, 0.050 mg [PdCl<sub>2</sub>(CH<sub>3</sub>CN)<sub>2</sub>] were added into 15.0 mL of methanol. After addition of 0.080 mg activated [Ni(H<sub>2</sub>BDP-SO<sub>3</sub>)<sub>2</sub>]. After 1 day, the solid was filtered and washed with methanol to remove the unreacted [PdCl<sub>2</sub>(CH<sub>3</sub>CN)<sub>2</sub>]. Was obtained as a dark red color powder, which was kept under air atmosphere.

### **1.4. Suzuki cross coupling reaction**

In a typical reaction, a mixture of aryl halides (1 mmol), arylboronic acid (1.2 mmol), base (1.5 mmol), and the catalyst (0.39 mg, 0.005 mmol of Pd against aryl halide substrate) in solvent (5 mL) was placed in a glass vial flask. The resulting mixture was stirred for 0.5-20 h at 25-100 °C. After the reaction was complete, the mixture was cooled to room temperature

and the catalyst was filtered off. Next, the organic products were separated by extraction with 10 mL of diethyl ether. The extracts (10 mL) were GC-FID analyzed with dodecane (0.050 mL) as an internal standard to determine the conversion of aryl halide. The products of the reaction were determined by GC-MS.

### **1.5. Carbonylative Suzuki-Miyaura reaction**

Reactions were performed in a Schlenk tube. Weighted amounts of the solid reactants: phenylboronic acids (1.1 mmol), base (3.0 mmol), catalyst (0.39 mg), 4-iodoanisole (1 mmol), and 5 mL of solvent (anisole or toluene) were introduced to the Schlenk tube. Next, the Schlenk tube was sealed with a teflon septum equipped with capillary connected to a CO gas cylinder with CO and introduced into an oil bath preheated to 100 °C. The continuous flow of gas (aprox. 0.5 L/h) was made possible by the use of a fine needle inserted in the septum. The reaction mixture was magnetically stirred at a given temperature for 5 h, and after this time it was left for several minutes to cool down. The organic product was separated by extraction with 10 mL of diethyl ether. The extracts (10 mL) were GC-FID analyzed with dodecane (0.050 mL) as an internal standard to determine the conversion of aryl iodide. The products of the reaction were determined by GC-MS.

**Table S1. Optimization of the reaction condition<sup>a</sup>**

| Entry | Base                           | Solvent                                         | Conversion (%) <sup>b</sup>       |
|-------|--------------------------------|-------------------------------------------------|-----------------------------------|
| 1     | K <sub>2</sub> CO <sub>3</sub> | <sup>i</sup> PrOH/H <sub>2</sub> O <sup>e</sup> | 0 <sup>c</sup>                    |
| 2     | K <sub>2</sub> CO <sub>3</sub> | <sup>i</sup> PrOH/H <sub>2</sub> O <sup>e</sup> | 0 <sup>d</sup>                    |
| 3     | K <sub>2</sub> CO <sub>3</sub> | H <sub>2</sub> O                                | 50                                |
| 4     | K <sub>2</sub> CO <sub>3</sub> | <sup>i</sup> PrOH                               | 60                                |
| 5     | K <sub>2</sub> CO <sub>3</sub> | <sup>i</sup> PrOH/H <sub>2</sub> O <sup>e</sup> | 91 <sup>f</sup> , 97 <sup>g</sup> |
| 6     | K <sub>2</sub> CO <sub>3</sub> | <sup>i</sup> PrOH/H <sub>2</sub> O <sup>e</sup> | 58 <sup>h</sup>                   |
| 7     | K <sub>2</sub> CO <sub>3</sub> | <sup>i</sup> PrOH/H <sub>2</sub> O <sup>e</sup> | 0 <sup>i</sup>                    |

- a) Reaction conditions: 4-bromoanisole (1 mmol), phenylboronic acid (1.2 mmol), base (1.5 mmol), Pd@[Ni(H<sub>2</sub>BDP-SO<sub>3</sub>)<sub>2</sub>] (0.5 mol % of Pd) solvent (H<sub>2</sub>O/<sup>i</sup>PrOH) (5 mL).
- b) GC analysis, conversion based on 4-bromoanisole.
- c) Without catalyst.
- d) [Ni(H<sub>2</sub>BDP-SO<sub>3</sub>)<sub>2</sub>] (alone).
- e) 1:1 (v/v) ratio.
- f) 25 °C, 8 hours
- g) 60 °C, 4 hours
- h) Pd@[Ni(H<sub>2</sub>BDP-SO<sub>3</sub>)<sub>2</sub>] (0.3 mol % of Pd)
- i) Control leaching reaction, ICP of the liquid phase is 0,039 ppm of Pd

**Table S2. Optimization of the reaction condition<sup>a</sup>**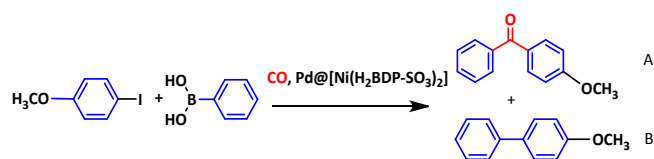

| Entry | Base                           | Solvent | Time (h) | Temp. (°C) | Conv.(%) <sup>b</sup> | A (%) | B (%) |
|-------|--------------------------------|---------|----------|------------|-----------------------|-------|-------|
| 1     | K <sub>2</sub> CO <sub>3</sub> | Toluene | 5        | 105        | 30* <sup>c</sup>      | 12    | 18    |
| 2     | K <sub>2</sub> CO <sub>3</sub> | Anisole | 5        | 105        | 80* <sup>c</sup>      | 21    | 59    |
| 3     | K <sub>2</sub> CO <sub>3</sub> | Anisole | 5        | 105        | 66* <sup>d</sup>      | 51    | 15    |
| 4     | K <sub>2</sub> CO <sub>3</sub> | Anisole | 1        | 105        | 42* <sup>e</sup>      | 42    | 0     |
| 5     | K <sub>2</sub> CO <sub>3</sub> | Anisole | 2        | 105        | 42* <sup>e</sup>      | 42    | 0     |
| 6     | K <sub>2</sub> CO <sub>3</sub> | Anisole | 3        | 105        | 49* <sup>e</sup>      | 49    | 0     |
| 7     | K <sub>2</sub> CO <sub>3</sub> | Anisole | 5        | 105        | 50* <sup>e</sup>      | 50    | 0     |
| 8     | K <sub>2</sub> CO <sub>3</sub> | Anisole | 16       | 105        | 67* <sup>e</sup>      | 67    | 0     |
| 9     | K <sub>2</sub> CO <sub>3</sub> | Anisole | 3        | 80         | 33* <sup>e</sup>      | 33    | 0     |
| 10    | KHCO <sub>3</sub>              | Anisole | 3        | 80         | 32* <sup>e</sup>      | 32    | 0     |
| 11    | KOH                            | Anisole | 3        | 80         | 27* <sup>e</sup>      | 27    | 0     |
| 12    | K <sub>2</sub> CO <sub>3</sub> | Anisole | 7        | 80         | 34* <sup>e</sup>      | 34    | 0     |
| 13    | K <sub>2</sub> CO <sub>3</sub> | DMF     | 3        | 80         | 0* <sup>e</sup>       | 0     | 0     |
| 14    | K <sub>2</sub> CO <sub>3</sub> | Anisole | 3        | 80         | 36** <sup>e</sup>     | 36    | 0     |
| 15    | K <sub>2</sub> CO <sub>3</sub> | Anisole | 3        | 105        | 58** <sup>e</sup>     | 58    | 0     |
| 16    | K <sub>2</sub> CO <sub>3</sub> | Anisole | 3        | 105        | 61*** <sup>e</sup>    | 61    | 0     |

a) Reaction conditions: 4-iodoanisole (1 mmol), phenylboronic acid (1.1 mmol), base (3 mmol), solvent (5 mL).

b) GC analysis, conversion based on 4-iodoanisole.

c) balloon

d) 5 Bar

e) 10 Bar

\* 0.5 % mol Pd

\*\* 1 % mol Pd

\*\*\* 2 % mol Pd

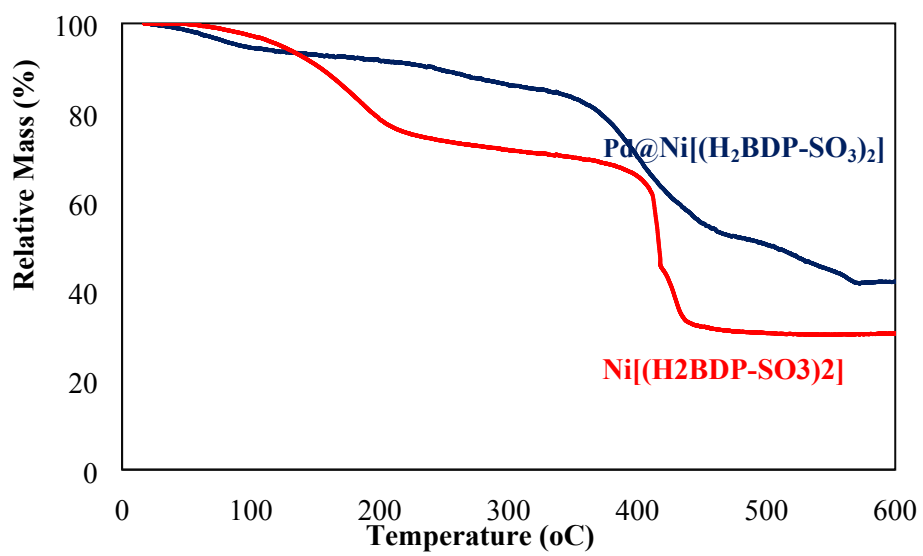

Fig. S1. TGA curves of (blue) Pd@[Ni(H<sub>2</sub>BDP-SO<sub>3</sub>)<sub>2</sub>] and (red) [Ni(H<sub>2</sub>BDP-SO<sub>3</sub>)<sub>2</sub>].

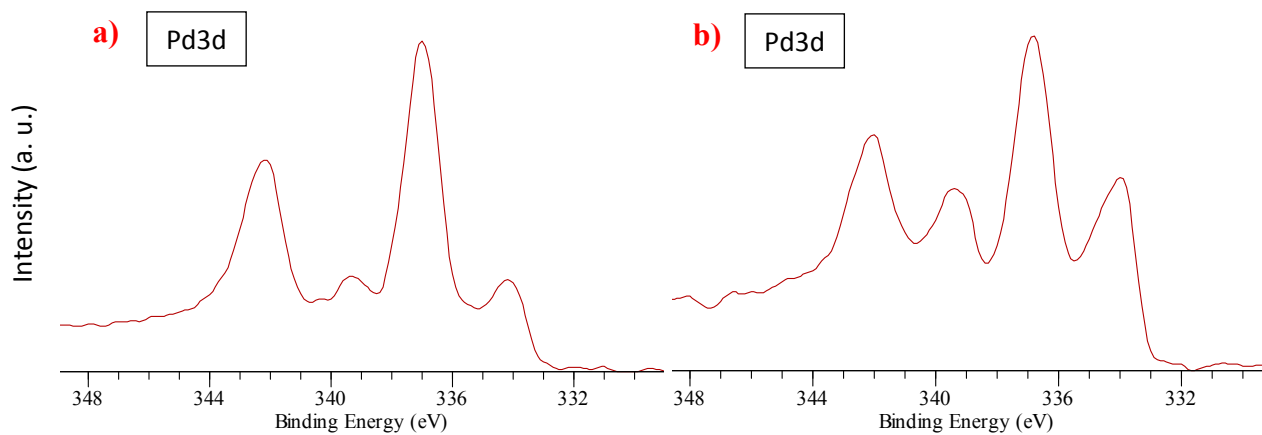

Fig. S2. XPS spectrum of different elements of Pd@[Ni(H<sub>2</sub>BDP-SO<sub>3</sub>)<sub>2</sub>]: a) before reaction, b) after reaction. Pd form: Pd(0) 334.0 and 339.3 eV, Pd(II) 336.9 and 342.6 eV.

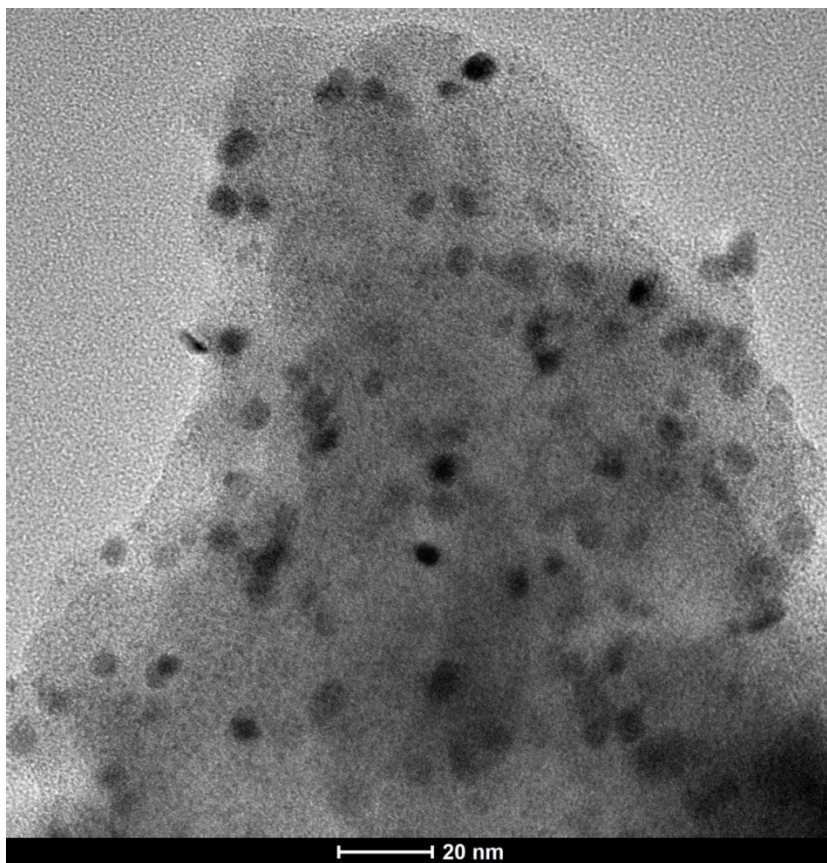

Fig. S3. TEM images of Pd@[Ni(H<sub>2</sub>BDP-SO<sub>3</sub>)<sub>2</sub>] after Suzuki reaction 4<sup>st</sup> run.



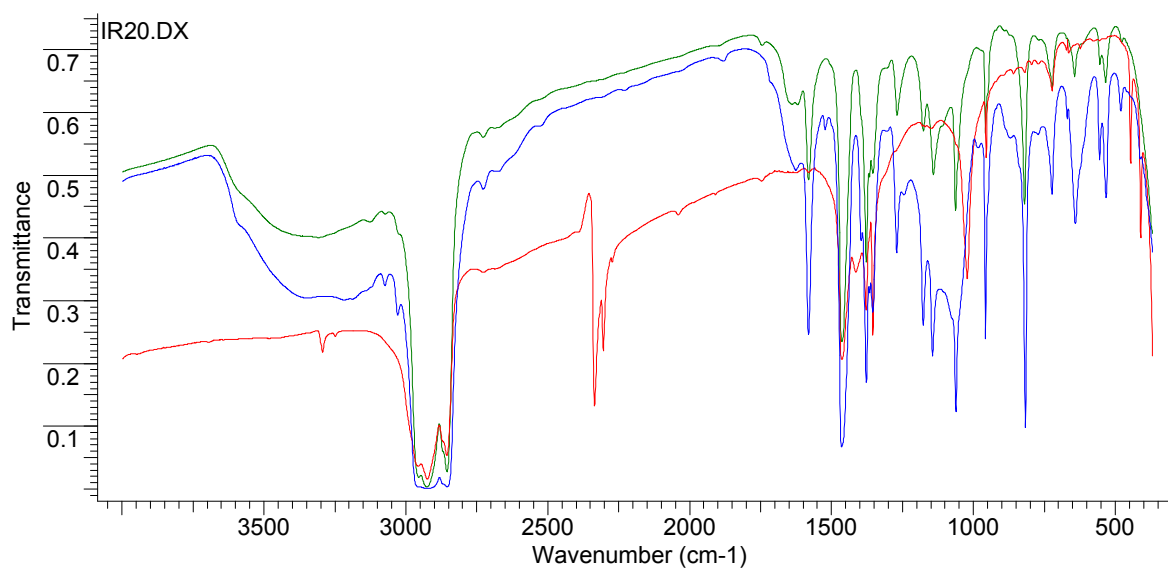

Fig. S4. FT-IR (nujol) spectra of: [PdCl<sub>2</sub>(CH<sub>3</sub>CN)<sub>2</sub>] (red), [Ni(H<sub>2</sub>BDP-SO<sub>3</sub>)<sub>2</sub>] (blue) Pd@[Ni(H<sub>2</sub>BDP-SO<sub>3</sub>)<sub>2</sub>] (green)

## References

- 1 V. Colombo, C. Montoro, A. Maspero, N. Masciocchi, S. Galli, E. Barea and J.A.R. Navarro, *J. Am. Chem. Soc.*, 2012, **134**, 12830.
